# Supplementary material for: Development of a Simultaneous Normal-Phase HPLC Analysis of Lignans, Tocopherols, Phytosterols, and Squalene in Sesame Oil Samples
Source: MDPI journal article supplement (doi:10.3390/foods13091368), 2024-04-28
Supplement: s1 [file s1]

## Supplementary materials

# Development of a Simultaneous Normal-Phase HPLC Analysis of Lignans, Tocopherols, Phytosterols and Squalene in Sesame Oil Samples

Jitkunya Yuenyong<sup>1,2</sup>, Chonlada Bennett<sup>1,3</sup>, Sudarat Jiamyangyuen<sup>4</sup>, Sugunya Mahatheeranont<sup>1,3,5,6</sup>, and Phumon Sookwong<sup>1,3,6\*</sup>

[Supplementary Table 1](#). Detail of sesame oil samples used in this study.

| Sample SO     |      | Description                                                               | Source    |
|---------------|------|---------------------------------------------------------------------------|-----------|
| <b>CPO-1</b>  | (1)  | Cold-pressed white sesame oil (100%)                                      | Thailand  |
| <b>CPO-2</b>  | (2)  | Cold-pressed black sesame oil (100%)                                      | Thailand  |
| <b>CPO-3</b>  | (3)  | Cold-pressed black sesame oil (100%)                                      | Thailand  |
| <b>CPO-4</b>  | (4)  | Cold-pressed black sesame oil (100%)                                      | Thailand  |
| <b>CPO-5</b>  | (5)  | Cold-pressed black sesame oil (100%)                                      | Thailand  |
| <b>CPO-6</b>  | (6)  | Cold-pressed black sesame oil (100%)                                      | Thailand  |
| <b>CPO-7</b>  | (7)  | Cold-pressed black sesame oil (100%)                                      | Thailand  |
| <b>SOS-1</b>  | (8)  | Cold-pressed black sesame oil (100%) in soft gel                          | Thailand  |
| <b>SOS-2</b>  | (9)  | Cold-pressed black sesame oil (100%) in soft gel                          | Thailand  |
| <b>SOS-3</b>  | (10) | Cold-pressed black sesame oil (100%) in soft gel                          | Thailand  |
| <b>SOS-4</b>  | (11) | Cold-pressed black sesame oil (100%) in soft gel                          | Thailand  |
| <b>SCO-1</b>  | (12) | Sesame oil from roasted white sesame seeds                                | China     |
| <b>SCO-2</b>  | (13) | Sesame oil from roasted white sesame seeds                                | Korea     |
| <b>SCO-3</b>  | (14) | Sesame oil from roasted white sesame seeds                                | Korea     |
| <b>SCO-4</b>  | (15) | Sesame oil from roasted white sesame seeds                                | Japan     |
| <b>SCO-5</b>  | (16) | Sesame oil from roasted black sesame seeds                                | China     |
| <b>SCO-6</b>  | (17) | Sesame oil from roasted black sesame seeds                                | China     |
| <b>SCO-7</b>  | (18) | Sesame oil from roasted black sesame seeds                                | China     |
| <b>SCO-8</b>  | (19) | Sesame oil from roasted white sesame seeds (95%) +black sesame seeds (5%) | China     |
| <b>SCO-9</b>  | (20) | White sesame oil (100%)                                                   | Thailand  |
| <b>SCO-10</b> | (21) | White sesame oil (100%)                                                   | Thailand  |
| <b>SCO-11</b> | (22) | Black sesame oil (100%)                                                   | India     |
| <b>SCO-12</b> | (23) | Black sesame oil (100%)                                                   | Singapore |
| <b>MSCO-1</b> | (24) | White sesame oil (50%) +soybean oil (50%)                                 | Singapore |
| <b>MSCO-2</b> | (25) | Black sesame oil (70%) +soybean oil (30%)                                 | Thailand  |
| <b>MSCO-3</b> | (26) | Black sesame oil (70%) +soybean oil (30%)                                 | Thailand  |
| <b>MSCO-4</b> | (27) | Black sesame oil (80%) +soybean oil (20%)                                 | Thailand  |
| <b>MSCO-5</b> | (28) | Sesame oil from roasted black sesame seeds (80%) +soybean oil (20%)       | China     |

**Supplementary Figure 1.** Chromatograms of some mobile phase ratios showed effective in the separation of the targeted compounds from the four conditions.

**A**

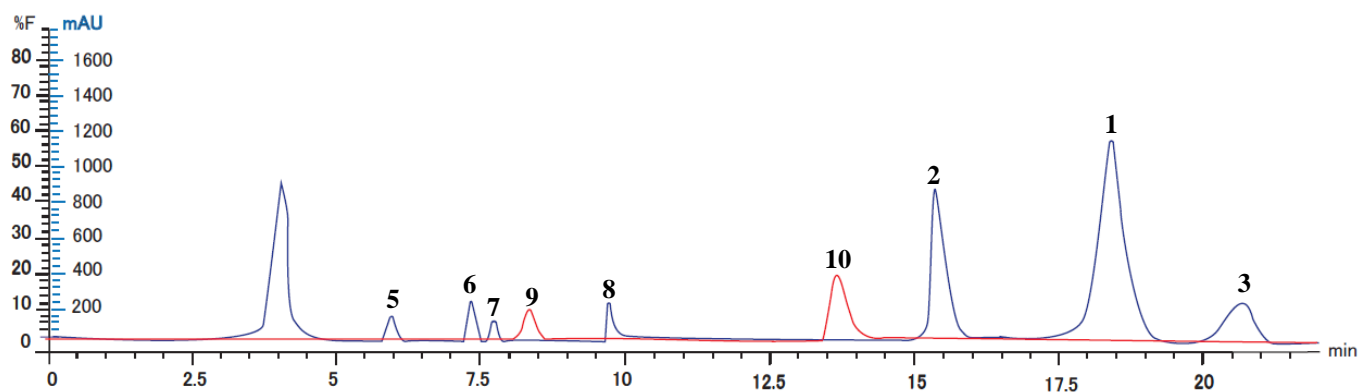

Condition A, a mixture of n-hexane/tetrahydrofuran/acetonitrile/2-propanol (93:6:0.5:0.5, v/v/v/v)

using a flow rate of  $0.8 \text{ mL min}^{-1}$

**B**

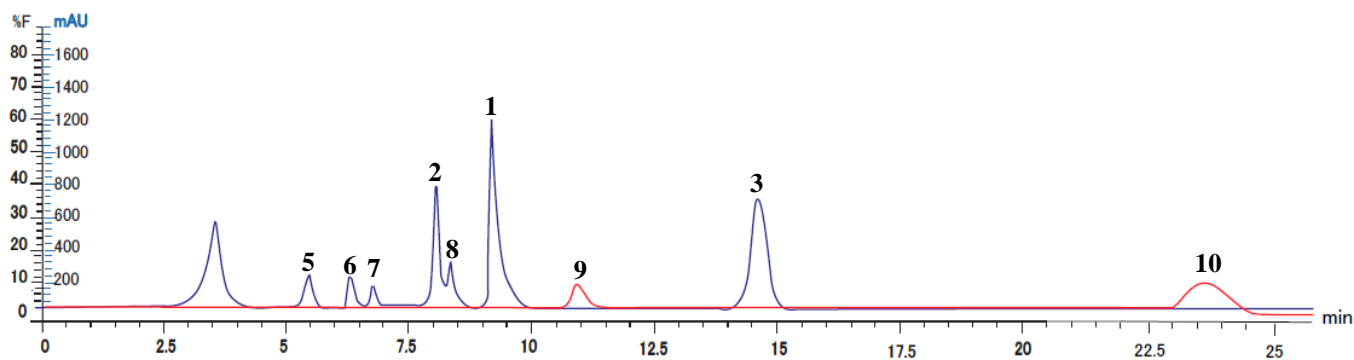

Condition B, a mixture of n-hexane/tetrahydrofuran/acetonitrile/2-propanol (92:6:1:1, v/v/v/v)

using a flow rate of  $0.5 \text{ mL min}^{-1}$ .

**C**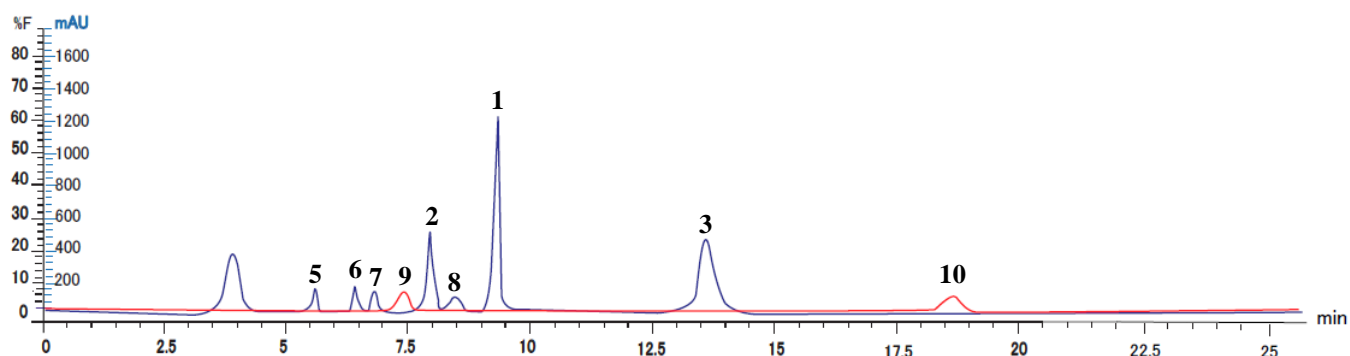

Condition C, a mixture of n-hexane/tetrahydrofuran/acetonitrile (93:6:1, v/v/v)  
using a flow rate of 1.2 of mL min<sup>-1</sup>

**D**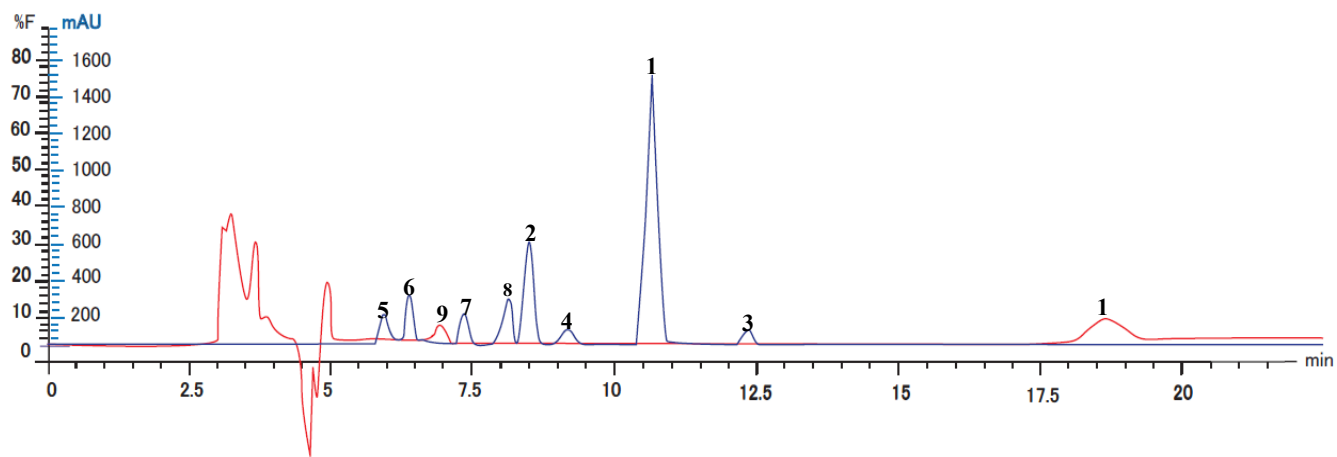

Condition D, a mixture of n-hexane/tetrahydrofuran/2-propanol (93:6:1, v/v/v)  
using a flow rate of 0.8 of mL min<sup>-1</sup>

Peak identification: 1 = Sesamin, 2 = Sesamolin, 3 = Sesamol, 4 = Asarinin, 5 =  $\alpha$ -Tocopherol, 6 =  $\beta$ -Tocopherol, 7 =  $\gamma$ -Tocopherol, 8 =  $\delta$ -Tocopherol, 9 = Squalene, and 10 = Phytosterol.
